# Supplementary material
Source: PubMed Central journal article supplement (PMC6592779)
Supplement: NIHMS1502899-supplement-1.pdf [file NIHMS1502899-supplement-1.pdf]

**Table 1. Individual barriers to older adult cancer patient access to psychological services**

| <b>Barriers</b>                                             | <b>Mean</b> | <b>Standard deviation</b> |
|-------------------------------------------------------------|-------------|---------------------------|
| Lack of patient knowledge of:                               |             |                           |
| Availability of mental health resources                     | 4.65        | .48                       |
| Importance of mental health for cancer patients             | 3.50        | 1.06                      |
| Relationship between physical and mental health             | 3.31        | 1.10                      |
| Skills/services of different mental health providers        | 2.88        | 1.23                      |
| Limited patient resources                                   |             |                           |
| Limited financial resources                                 | 3.88        | .93                       |
| Functional limitations                                      | 3.75        | .97                       |
| Limited social support                                      | 3.44        | .93                       |
| Negative patient beliefs                                    |             |                           |
| Stigma regarding mental health care                         | 3.88        | 1.11                      |
| Fear of cancer interferes with ability to talk about cancer | 3.06        | 1.03                      |
| Negative experience with mental health treatment            | 3.00        | .94                       |
| Belief that mental care means not fighting cancer           | 2.50        | 1.12                      |
| Stigma regarding cancer                                     | 2.44        | .86                       |
| Not wanting to take resources from others                   | 2.44        | 1.12                      |
| Difficulty with role changes                                |             |                           |
| Increased dependence on others                              | 3.44        | 1.06                      |
| Difficulty accepting help                                   | 2.81        | 1.01                      |
| Difficulty being in patient role                            | 2.56        | 1.00                      |
| Relative importance of individual barriers                  |             |                           |
| Limited patient resources                                   | 4.25        | .75                       |
| Lack of patient knowledge                                   | 3.56        | .86                       |
| Negative patient beliefs                                    | 3.38        | 1.11                      |
| Difficulty with role changes                                | 3.13        | 1.11                      |

**Table 2. Microsystem barriers to older adult cancer patient access to psychological services**

| <b>Barriers</b>                                                          | <b>Mean</b> | <b>Standard deviation</b> |
|--------------------------------------------------------------------------|-------------|---------------------------|
| <b>Medical team factors</b>                                              |             |                           |
| Competing demands on providers                                           | 4.47        | .85                       |
| Lack of physician training in mental health                              | 4.06        | .80                       |
| Lack of awareness of importance of mental health care                    | 3.82        | 1.15                      |
| Lack of physician training in communication                              | 3.76        | .94                       |
| High staff turnover                                                      | 3.47        | .85                       |
| Lack of continuing educational opportunities for mental health providers | 2.94        | .94                       |
| <b>Family factors</b>                                                    |             |                           |
| High caregiver burden                                                    | 4.18        | .78                       |
| Inadequate knowledge of mental health resources                          | 4.12        | .76                       |
| Inadequate caregiver support                                             | 4.00        | .91                       |
| <b>Mental health treatment factors</b>                                   |             |                           |
| Difficulty using online mental health resources                          | 3.71        | 1.02                      |
| Failure to consider patient health literacy                              | 3.47        | 1.04                      |
| Treatments too complex                                                   | 3.12        | .90                       |
| Treatments not culturally sensitive                                      | 2.94        | .94                       |
| Failure to assess trauma due to medical treatments                       | 2.81        | 1.18                      |
| <b>Relative importance of microsystem barriers</b>                       |             |                           |
| Medical team factors                                                     | 3.94        | .73                       |
| Family factors                                                           | 3.53        | .78                       |
| Mental health treatment factors                                          | 3.47        | .92                       |

**Table 3. Mesosystem barriers to older adult cancer patient access to psychological services**

| <b>Barriers</b>                                                                     | <b>Mean</b> | <b>Standard deviation</b> |
|-------------------------------------------------------------------------------------|-------------|---------------------------|
| Poor medical team communication                                                     |             |                           |
| Across care teams (e.g., referrals)                                                 | 3.76        | .88                       |
| Between care teams and patients' families                                           | 3.35        | 1.03                      |
| Within care teams (e.g., staff roles unclear)                                       | 3.06        | .94                       |
| Challenges of virtual communication across team members                             | 2.88        | .90                       |
| Poor care coordination                                                              |             |                           |
| Mental health providers not integrated into care team                               | 4.59        | .60                       |
| Oncologic and mental health services in different locations                         | 4.12        | .90                       |
| Online resources to bridge types of care are difficult for older adults to navigate | 3.41        | .97                       |
| Relative importance of mesosystem barriers                                          |             |                           |
| Poor care coordination                                                              | 4.29        | .75                       |
| Poor medical team communication                                                     | 3.88        | .96                       |

**Table 4. Exosystem barriers to older adult cancer patient access to psychological services**

| <b>Barriers</b>                                                         | <b>Mean</b> | <b>Standard deviation</b> |
|-------------------------------------------------------------------------|-------------|---------------------------|
| Inadequate system resources                                             |             |                           |
| Mental health service shortage                                          | 4.71        | .46                       |
| Shortage of mental health providers                                     | 4.24        | .88                       |
| Mental health screening unavailable                                     | 4.06        | .64                       |
| Inadequate transportation resources                                     | 3.65        | .76                       |
| Healthcare system factors                                               |             |                           |
| Lack of institutional support for mental health services                | 4.41        | .69                       |
| Lack of parity in insurance coverage                                    | 4.31        | .92                       |
| Slow pace of institutional change                                       | 4.00        | .84                       |
| Healthcare institutions not integrated with community services          | 3.88        | 1.08                      |
| Research gaps on:                                                       |             |                           |
| Strategies for educating legislators on older adult mental health needs | 3.41        | 1.03                      |
| Appropriate treatments for older adults                                 | 3.24        | 1.00                      |
| Different psychotherapy techniques                                      | 2.82        | 1.20                      |
| Societal mental illness stigma                                          |             |                           |
| Mental health treatment not normalized                                  | 3.94        | 1.06                      |
| Depression in cancer patients seen as normal                            | 3.65        | 1.03                      |
| Negative societal view of mental illness and care                       | 3.53        | 1.38                      |
| Relative importance of exosystem barriers                               |             |                           |
| Inadequate system resources                                             | 4.35        | .76                       |
| Healthcare system factors                                               | 4.35        | .76                       |
| Societal mental illness stigma                                          | 3.53        | 1.19                      |
| Research gaps                                                           | 2.94        | .80                       |

**Table 5. Individual and microsystem strategies to improve older adult cancer patient access to psychological services**

| <b>Strategies</b>                                                                                           | <b>Mean</b> | <b>Standard deviation</b> |
|-------------------------------------------------------------------------------------------------------------|-------------|---------------------------|
| <b>Patient education</b>                                                                                    |             |                           |
| Use clear and accessible language                                                                           | 4.13        | 1.02                      |
| Market mental health resources in oncology practices                                                        | 3.93        | .93                       |
| Provide information on mental health across cancer trajectory                                               | 3.80        | 1.17                      |
| Provide information on stress/anxiety/depression during initial treatment planning                          | 3.73        | 1.00                      |
| Use various strategies to provide information                                                               | 3.67        | .87                       |
| <b>Educate/incentivize providers</b>                                                                        |             |                           |
| Integrate mental health training in medical school/residency                                                | 4.13        | 1.26                      |
| Incentivize providers to refer distressed patients to mental health care                                    | 3.87        | 1.09                      |
| Provide team with tools for educating patients/families on mental health services                           | 3.73        | 1.06                      |
| Provide training in effective communication with patients                                                   | 3.47        | 1.36                      |
| Give providers information on patients' mental health needs and available services                          | 3.47        | 1.15                      |
| Facilitate providers' ability to monitor patient mental health                                              | 3.27        | 1.06                      |
| Increase provider awareness of relationship between patient-provider relationship and patient mental health | 3.20        | 1.22                      |
| Give providers empirical data on benefit of mental health care                                              | 3.13        | 1.15                      |
| <b>Support families</b>                                                                                     |             |                           |
| Provide families with mental health services                                                                | 4.20        | .91                       |
| Integrate families into patient care                                                                        | 3.93        | 1.06                      |
| Provide families with information on when mental health treatment or change in treatment is indicated       | 3.80        | 1.17                      |
| Provide families with information on emotional impact of cancer                                             | 3.60        | 1.02                      |
| Help families find mental health resources for older adults                                                 | 3.47        | .81                       |
| Provide families with information on the negative impact of distress in patients and family members         | 3.47        | 1.15                      |
| <b>Improve distress screening</b>                                                                           |             |                           |
| Consider multiple strategies for implementing distress screening                                            | 4.07        | .57                       |
| Identify patients' mental health treatment preferences                                                      | 4.00        | .97                       |
| Repeat distress screening over time                                                                         | 3.93        | .85                       |
| Utilize standardized geriatric-specific distress screening                                                  | 3.93        | .85                       |
| Assess patient and preferences for mental health care                                                       | 3.80        | .98                       |
| Integrate distress screening into other cancer screening efforts                                            | 3.73        | 1.06                      |
| Screen family members for distress                                                                          | 3.67        | 1.14                      |

**Table 5, continued. Individual and microsystem strategies to improve older adult cancer patient access to psychological services**

| <b>Strategies</b>                                                        | <b>Mean</b> | <b>Standard deviation</b> |
|--------------------------------------------------------------------------|-------------|---------------------------|
| Improve treatment delivery                                               |             |                           |
| Bring mental health treatment to the patient                             | 4.53        | .72                       |
| Be flexible with the timing and course of treatment                      | 4.13        | .96                       |
| Change delivery method over treatment to meet patient needs              | 4.13        | .96                       |
| Use all personnel to improve patient mental health                       | 4.07        | .85                       |
| Provide private space for mental health treatment                        | 3.93        | 1.29                      |
| Leverage community organizations to assist with treatment delivery       | 3.80        | 1.05                      |
| Use patient portal to deliver mental health treatments                   | 3.33        | .79                       |
| Improve treatment content                                                |             |                           |
| Adapt treatment content for older adults                                 | 4.33        | .87                       |
| Offer ranges of services for patients to select from                     | 4.27        | .85                       |
| Simplify mental health treatments to reduce patient burden               | 4.13        | .96                       |
| Provide culturally sensitive services                                    | 3.87        | .88                       |
| Include stories of patients who benefited from mental health treatment   | 3.60        | 1.08                      |
| Allow patients to meet others who benefited from mental health treatment | 3.47        | 1.09                      |
| Increase peer/social support                                             | 3.27        | .93                       |
| Utilize technology                                                       | 3.00        | 1.03                      |
| Integrate biofeedback                                                    | 2.73        | 1.18                      |
| Relative importance of individual/microsystem strategies                 |             |                           |
| Improve treatment delivery                                               | 4.53        | .62                       |
| Educate/incentivize providers                                            | 4.07        | 1.18                      |
| Improve treatment content                                                | 4.00        | .82                       |
| Improve distress screening                                               | 3.87        | 1.09                      |
| Patient education                                                        | 3.73        | 1.00                      |
| Support families                                                         | 3.71        | .88                       |

**Table 6. Mesosystem strategies to improve older adult cancer patient access to psychological services**

| <b>Strategies</b>                                                            | <b>Mean</b> | <b>Standard deviation</b> |
|------------------------------------------------------------------------------|-------------|---------------------------|
| Improve medical team communication                                           |             |                           |
| Improve mental health referral process                                       | 4.40        | .71                       |
| Improve communication between family and staff                               | 4.07        | .93                       |
| Provide opportunities for communication across teams                         | 4.00        | 1.03                      |
| Provide training to the team to increase knowledge of mental health services | 3.73        | .68                       |
| Clearly define team members' roles                                           | 3.40        | 1.2                       |
| Improve care coordination                                                    |             |                           |
| Co-locate oncology and mental health services                                | 4.60        | .61                       |
| Standardize care plans to include mental health screening and care options   | 4.00        | .89                       |
| Include mental health providers on care team                                 | 4.73        | .44                       |
| Relative importance of mesosystem strategies                                 |             |                           |
| Improve care coordination                                                    | 4.46        | .62                       |
| Improve medical team communication                                           | 4.07        | .93                       |

**Table 7. Exosystem and macrosystem strategies to improve older adult cancer patient access to psychological services**

| <b>Strategies</b>                                                                                                            | <b>Mean</b> | <b>Standard deviation</b> |
|------------------------------------------------------------------------------------------------------------------------------|-------------|---------------------------|
| <b>Develop geriatric workforce</b>                                                                                           |             |                           |
| Train more oncology and mental health providers in geriatrics                                                                | 4.33        | .87                       |
| Train more psychosocial oncology providers                                                                                   | 4.20        | .98                       |
| Provide additional training to current providers on aging issues                                                             | 4.00        | 1.21                      |
| Standardize mental health provider training programs                                                                         | 3.53        | 1.09                      |
| <b>Improve healthcare system interventions</b>                                                                               |             |                           |
| Use access to mental health services as a quality measure                                                                    | 4.36        | .89                       |
| Capitalize on standards of care that include mental health (e.g., Commission on Cancer)                                      | 4.33        | .70                       |
| Connect mental health service provision to accreditation                                                                     | 4.33        | .94                       |
| Incentivize organizations to provide mental health care                                                                      | 4.13        | .88                       |
| Build partnerships across institutions to improve access to mental health services                                           | 3.86        | .83                       |
| Provide support for patient transportation services                                                                          | 3.60        | 1.02                      |
| Provide institutional leaders with information on the relationship between mental health services and healthcare utilization | 3.53        | 1.15                      |
| Provide institutional leaders with information on mental health services                                                     | 3.47        | .88                       |
| <b>Develop research initiatives</b>                                                                                          |             |                           |
| Share data on the impact of mental health treatment on healthcare utilization                                                | 3.87        | 1.02                      |
| Conduct research on the cost effectiveness of early integration of mental health treatment into cancer care                  | 3.80        | 1.05                      |
| Examine strategies for maximizing the integration and efficiency of mental health services                                   | 3.80        | 1.17                      |
| Conduct research on how to scale-up mental health treatment strategies                                                       | 3.67        | 1.07                      |
| <b>Increase advocacy and policy efforts</b>                                                                                  |             |                           |
| Promote policies that increase funding and reimbursement for mental health services                                          | 4.20        | .91                       |
| Partner with policymakers committed to mental health needs/services                                                          | 3.67        | .60                       |
| Advocate for mental health to be a priority for policy initiatives                                                           | 3.60        | .88                       |
| <b>Normalize mental health treatment</b>                                                                                     |             |                           |
| Normalize mental health care as part of oncology care                                                                        | 4.07        | 1.12                      |
| Use less stigmatizing language when referring to mental health services                                                      | 3.80        | 1.17                      |
| Public awareness campaign                                                                                                    | 3.40        | 1.20                      |
| Normalize mental health services using patient peer groups                                                                   | 3.33        | 1.07                      |

**Table 7 continued. Exosystem and macrosystem strategies to improve older adult**



**cancer patient access to psychological services**

| <b>Strategies</b>                                                     | <b>Mean</b> | <b>Standard deviation</b> |
|-----------------------------------------------------------------------|-------------|---------------------------|
| Feature information on mental health on disease organization websites | 3.27        | 1.12                      |
| Involve legislators in campaigns to reduce stigma                     | 3.21        | 1.21                      |
| Use social media to spread information                                | 3.27        | 1.12                      |
| Relative importance of exosystem/macrosystem strategies               |             |                           |
| Improve healthcare system interventions                               | 4.2         | .91                       |
| Develop geriatric workforce                                           | 4.13        | 1.09                      |
| Increase advocacy and policy efforts                                  | 4.00        | .73                       |
| Normalize mental health treatment                                     | 3.93        | 1.18                      |
| Develop research initiatives                                          | 3.80        | .98                       |
